# Supplementary material for: A new method for the synthesis of diamantane by hydroisomerization of binor-S on treatment with sulfuric acid
Source: publisher site journal article supplement (doi:10.3762/bjoc.16.205), 2020-10-12
Supplement: Additional file 1 [file 1860-5397-16-205-S1.pdf]

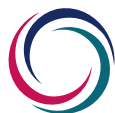

## Supporting Information

for

### **A new method for the synthesis of diamantane by hydroisomerization of binor-S on treatment with sulfuric acid**

Rishat I. Aminov and Ravil I. Khusnutdinov

*Beilstein J. Org. Chem.* **2020**, *16*, 2534–2539. [doi:10.3762/bjoc.16.205](https://doi.org/10.3762/bjoc.16.205)

### **Experimental procedures, NMR, and mass spectral data**

The graphical spectra of diamantane are identical to the literature data [Aminov, R. I., Akshieva, A. N., Khusnutdinov, R. I. *Catal. Commun.* **2019**, 130, 105756].

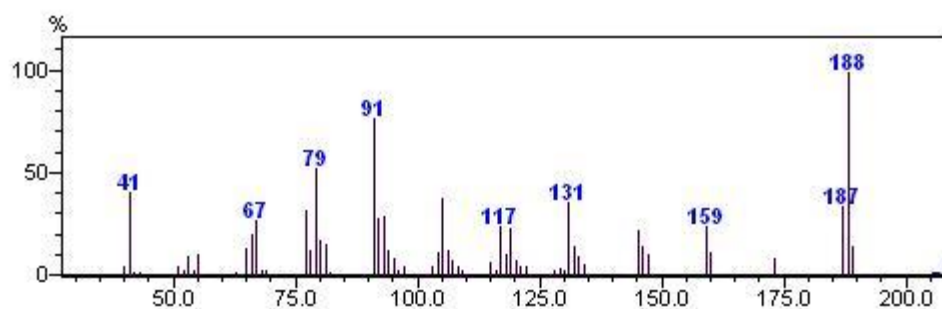

**Figure S1:** Mass spectrum of tetrahydrobinor-S (3c).

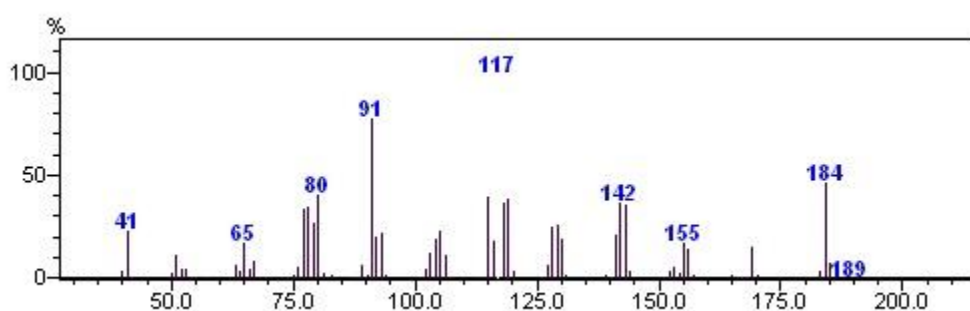

**Figure S2:** Mass spectrum of hexacyclo[8.4.0.0<sup>2,7</sup>.0<sup>3,14</sup>.0<sup>4,8</sup>.0<sup>9,13</sup>]tetradec-5-ene (4a).

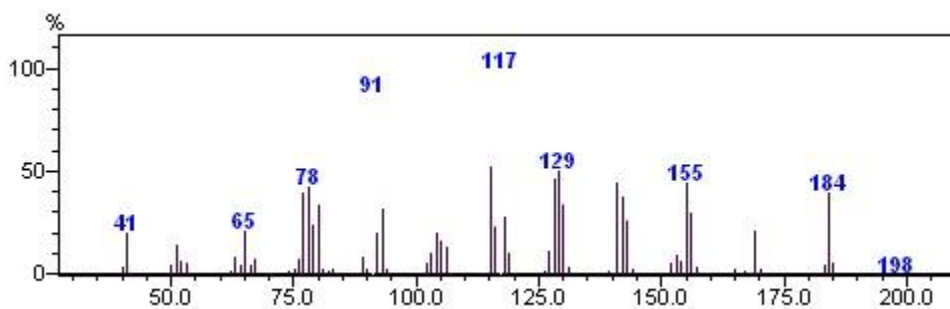

**Figure S3:** Mass spectrum of hexacyclo[6.6.0.0<sup>2,6</sup>.0<sup>5,14</sup>.0<sup>7,12</sup>.0<sup>9,13</sup>]tetradec-3-ene (4b)

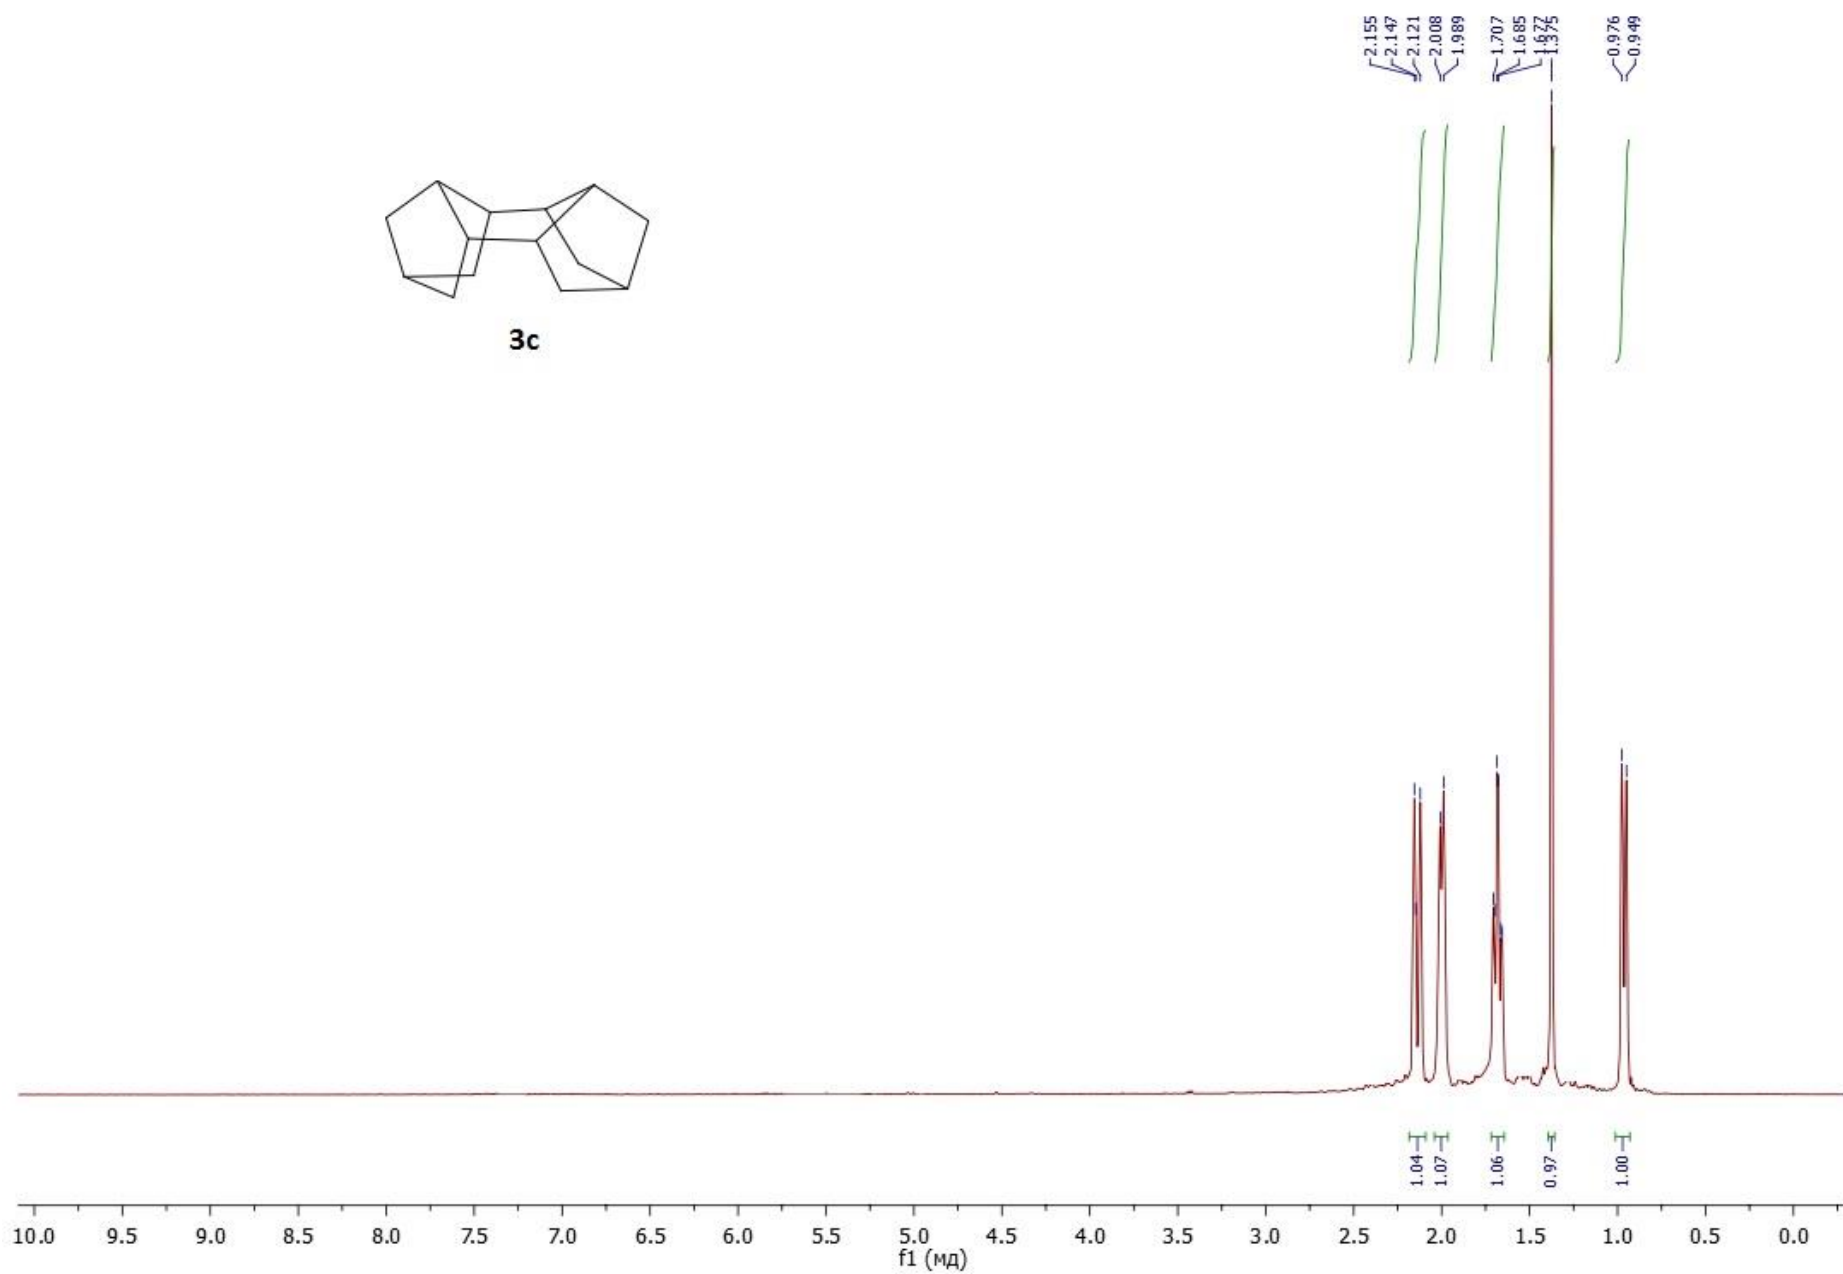

**Figure S4:** <sup>1</sup>H NMR spectrum of tetrahydrobinor-S (**3c**) in CDCl<sub>3</sub>.

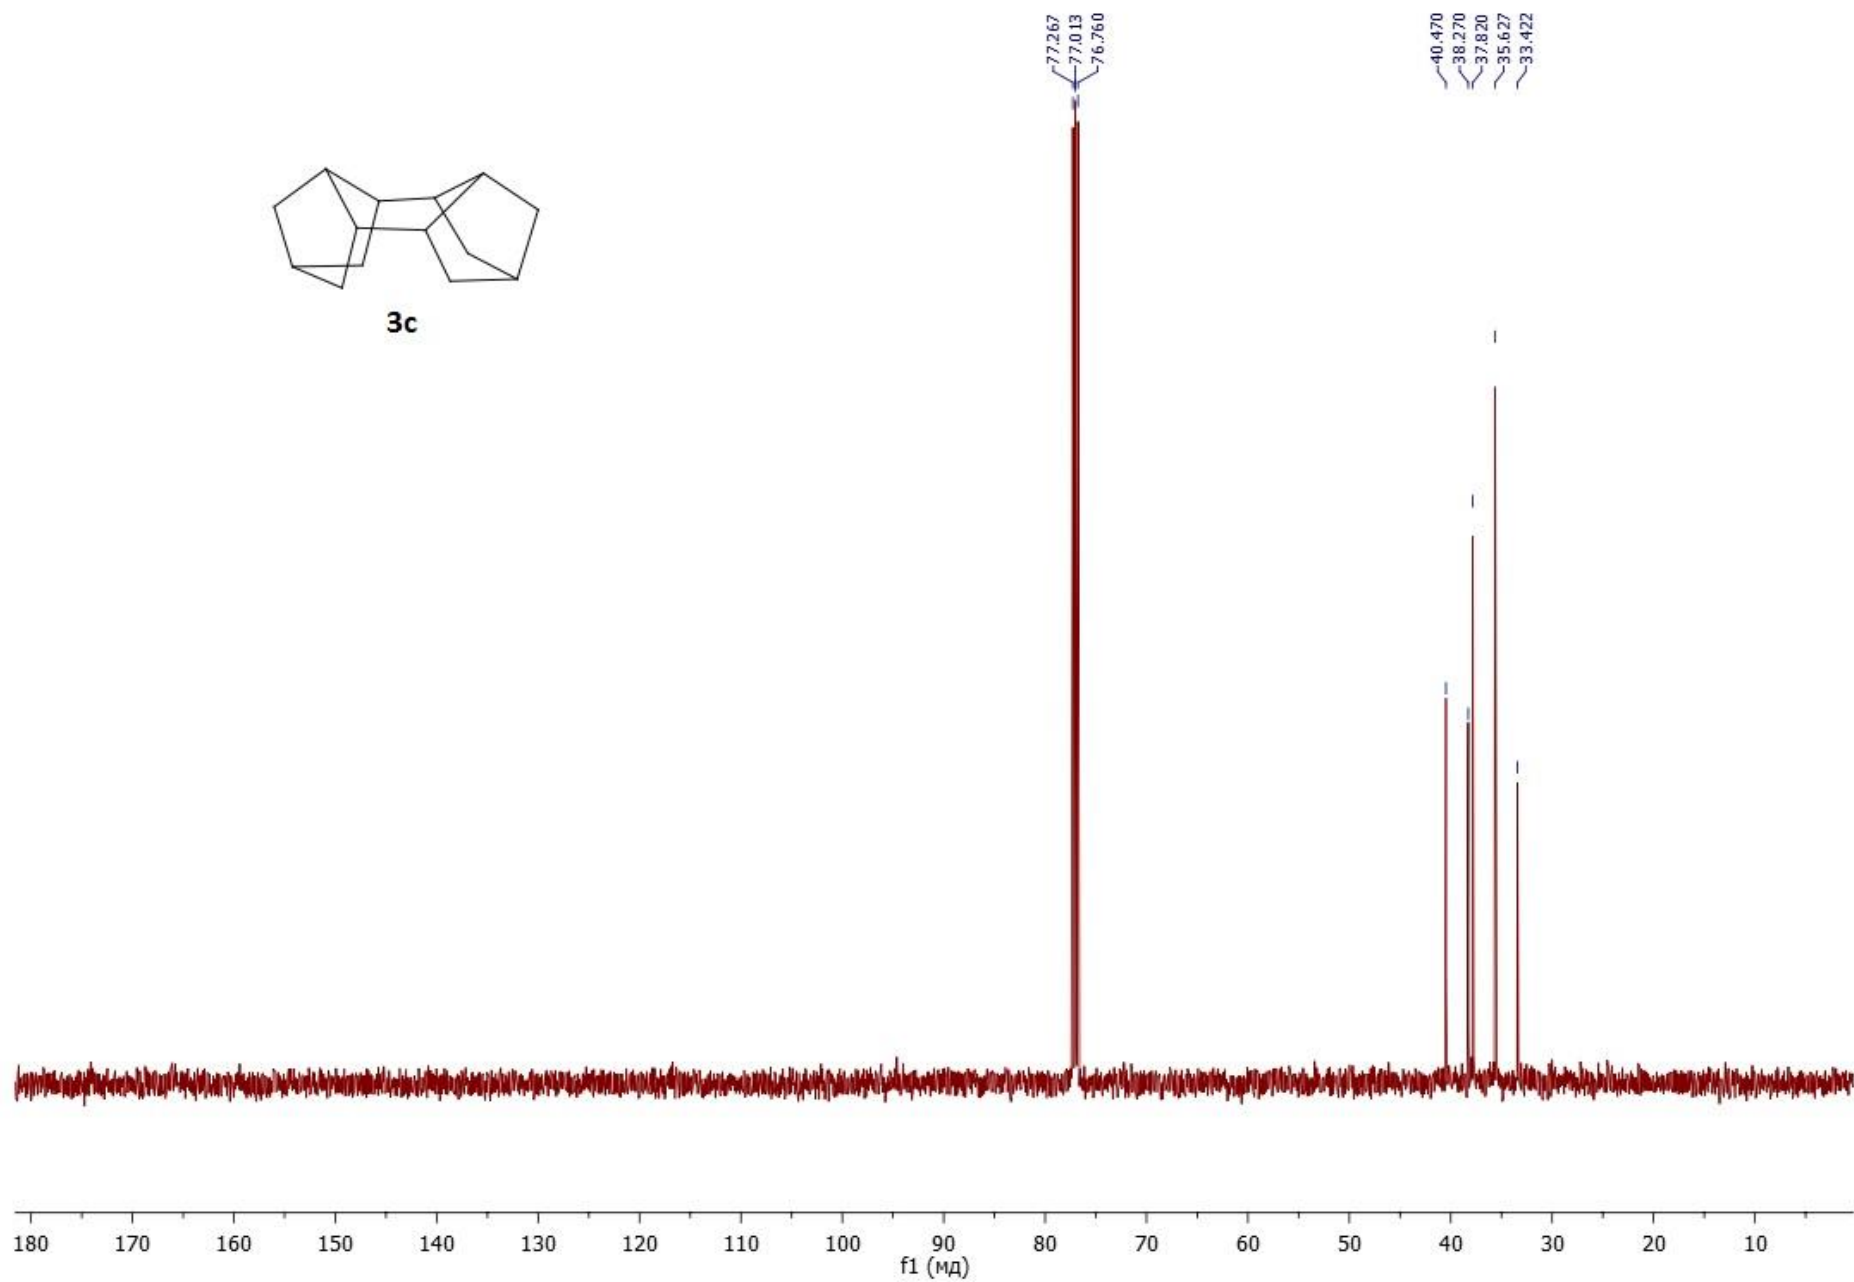

**Figure S5:**  $^{13}\text{C}$  NMR spectrum of tetrahydrobinor-S (**3c**) in  $\text{CDCl}_3$ .

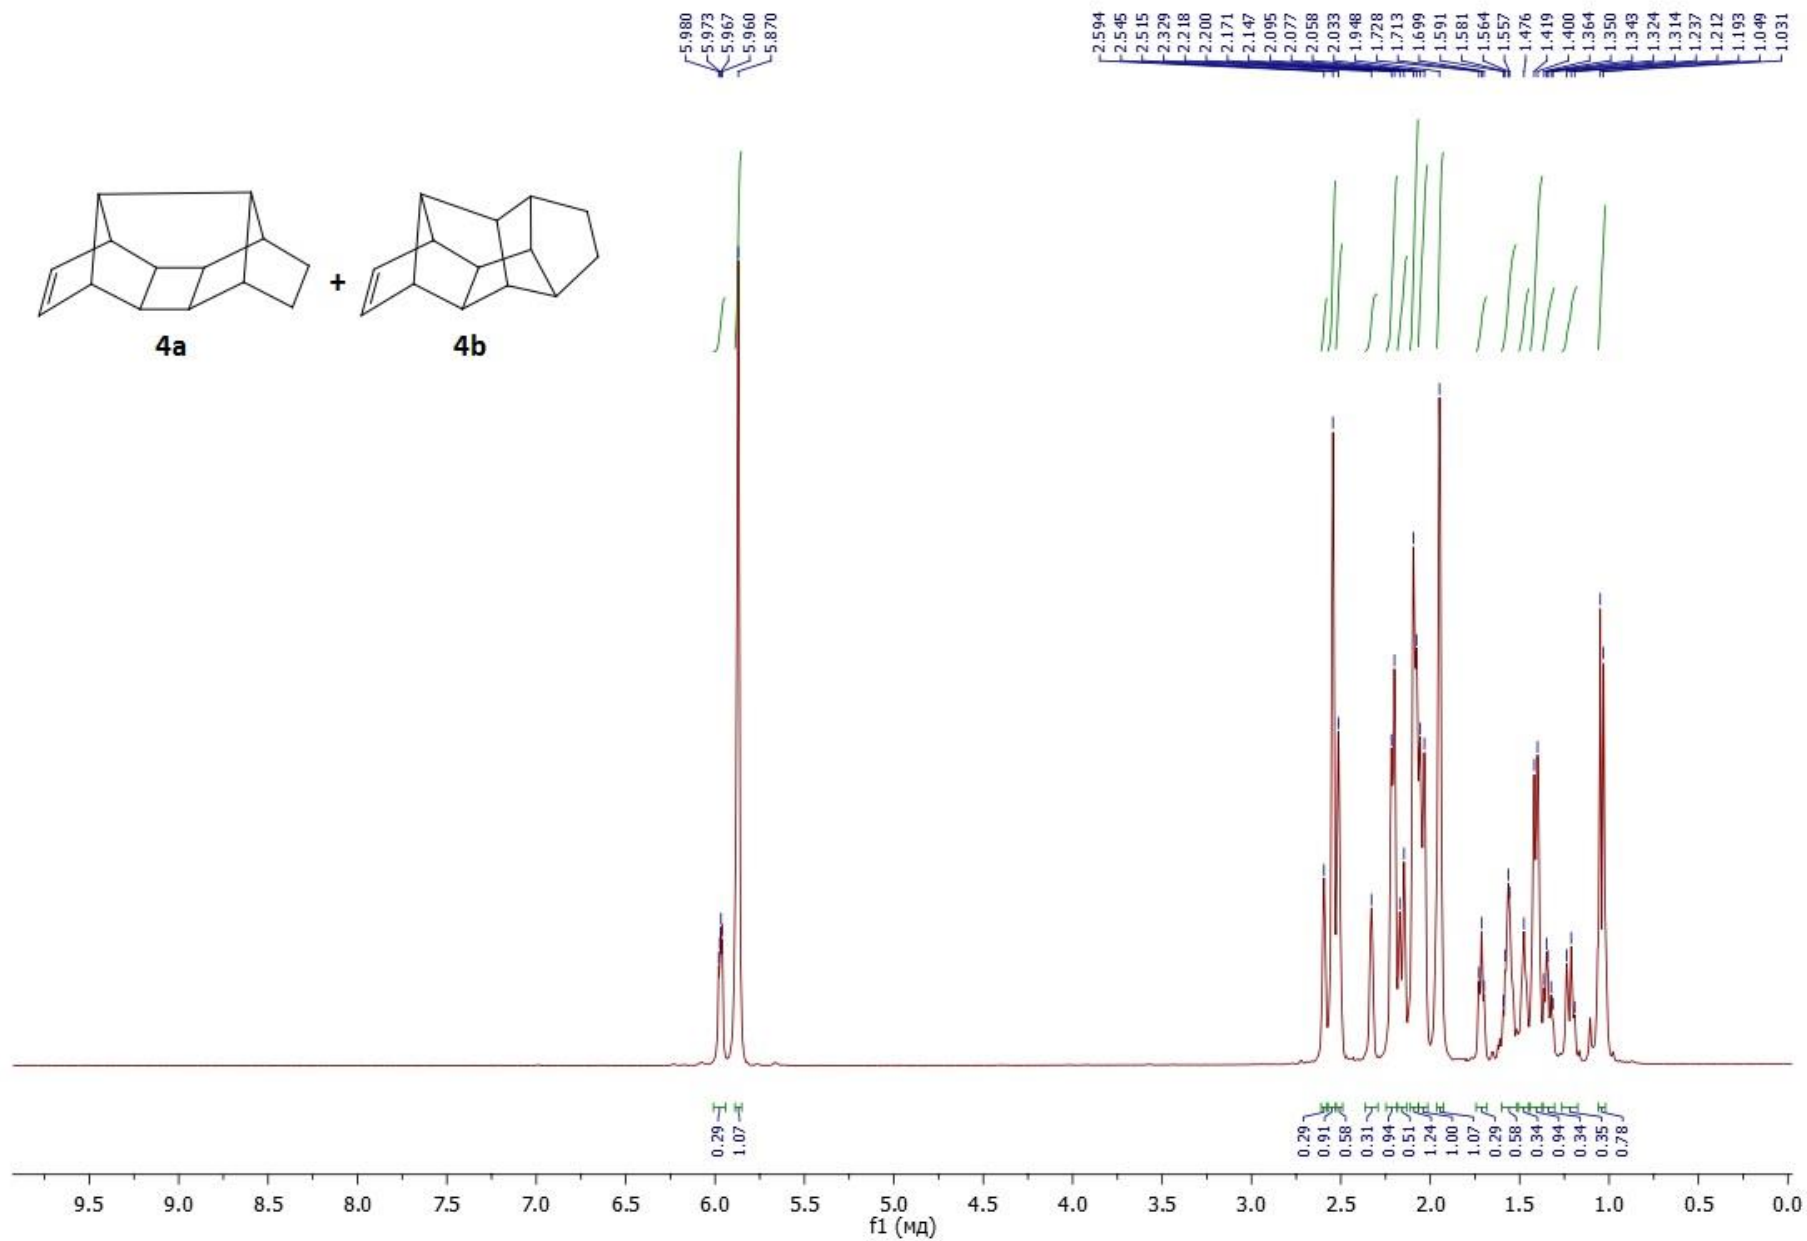

**Figure S6:**  $^1\text{H}$  NMR spectrum of mixture hexacyclo[8.4.0.0<sup>2,7</sup>.0<sup>3,14</sup>.0<sup>4,8</sup>.0<sup>9,13</sup>]tetradec-5-ene (**4a**) and hexacyclo[6.6.0.0<sup>2,6</sup>.0<sup>5,14</sup>.0<sup>7,12</sup>.0<sup>9,13</sup>]tetradec-3-ene (**4b**) in  $\text{CDCl}_3$ .

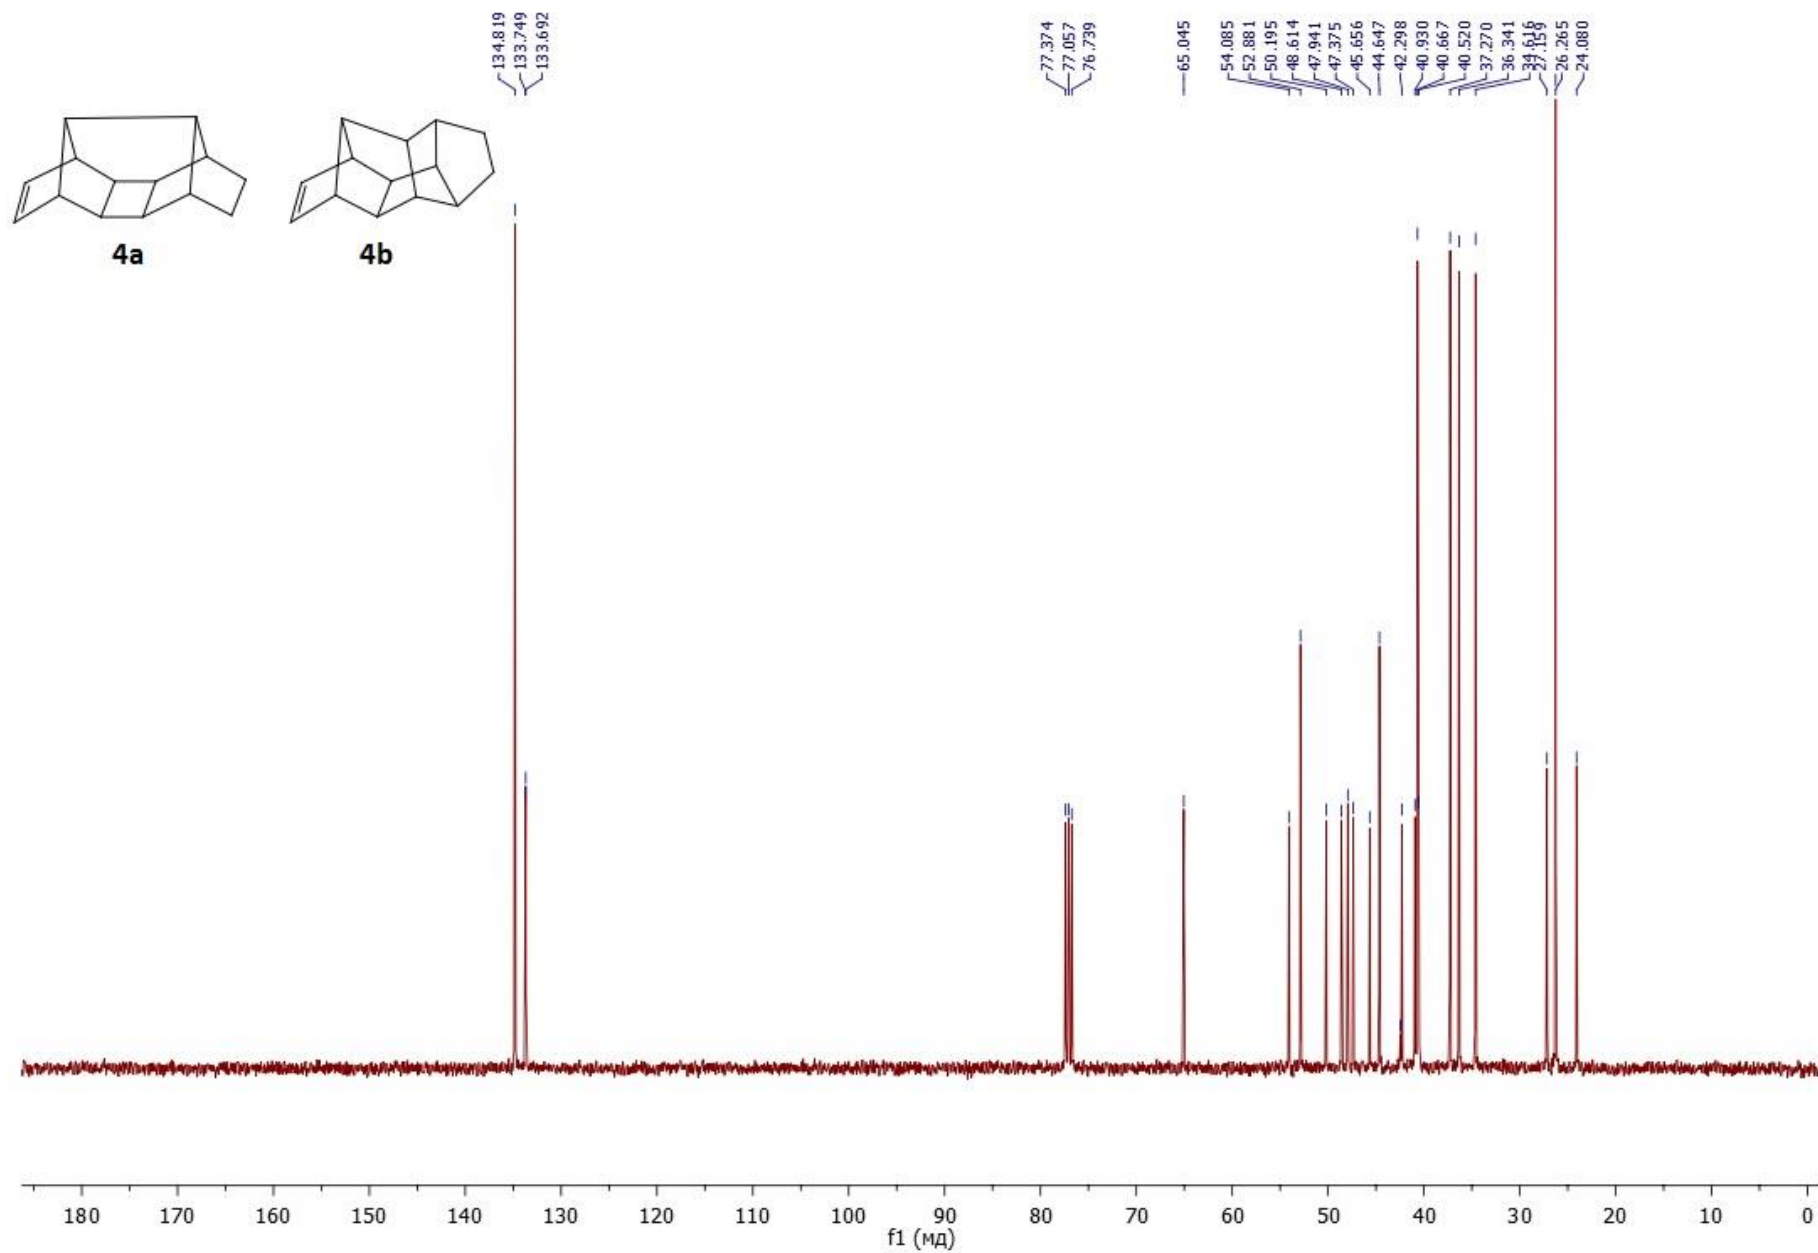

**Figure S7:**  $^{13}\text{C}$  NMR spectrum of mixture hexacyclo[8.4.0.0<sup>2,7</sup>.0<sup>3,14</sup>.0<sup>4,8</sup>.0<sup>9,13</sup>]tetradec-5-ene (**4a**) and hexacyclo[6.6.0.0<sup>2,6</sup>.0<sup>5,14</sup>.0<sup>7,12</sup>.0<sup>9,13</sup>]tetradec-3-ene (**4b**) in  $\text{CDCl}_3$ .
